# Supplementary material
Source: MDPI journal article supplement (https://www.mdpi.com/2073-4395/14/1/128)
Supplement: s1 [file s1]

**Supplementary Table S1.** Description of clusters for 8 quantitative traits of *D. alata* genotypes.

| Variables | Cluster 1-C1 (80)                               |               | Cluster 2-C2 (115)                                |               | Cluster 3-C3 (90)                                 |               |
|-----------|-------------------------------------------------|---------------|---------------------------------------------------|---------------|---------------------------------------------------|---------------|
|           | Mean $\pm$ SD                                   | Range         | Mean $\pm$ SD                                     | Range         | Mean $\pm$ SD                                     | Range         |
| YAD       | 244.91 $\pm$ 35.9 <sup>a</sup>                  | 133.75-362.92 | <b>228.49 <math>\pm</math> 28.99</b> <sup>b</sup> | 174.58-339.62 | <b>226.56 <math>\pm</math> 27.45</b> <sup>b</sup> | 163.33-311.67 |
| Pvig      | <b>1.91 <math>\pm</math> 0.29</b> <sup>a</sup>  | 1.00-2.5      | <b>1.85 <math>\pm</math> 0.31</b> <sup>a</sup>    | 1.17-2.5      | <b>1.86 <math>\pm</math> 0.29</b> <sup>a</sup>    | 1.00-2.5      |
| NTPP      | <b>2.20 <math>\pm</math> 0.87</b> <sup>a</sup>  | 1.00-7.33     | 1.58 $\pm$ 0.38 <sup>b</sup>                      | 1.00-2.67     | 1.74 $\pm$ 0.41 <sup>b</sup>                      | 1.00-2.83     |
| YPP       | 1.40 $\pm$ 0.32 <sup>b</sup>                    | 0.77-2.14     | <b>1.71 <math>\pm</math> 0.54</b> <sup>a</sup>    | 0.76-3.16     | 1.49 $\pm$ 0.38 <sup>b</sup>                      | 0.65-2.54     |
| TOxB      | 15.57 $\pm$ 4.2 <sup>b</sup>                    | 4.72-26.26    | 18.94 $\pm$ 3.79 <sup>a</sup>                     | 9.15-29.76    | <b>12.32 <math>\pm</math> 5.00</b> <sup>c</sup>   | 2.15-23.01    |
| DMC       | <b>29.37 <math>\pm</math> 2.69</b> <sup>a</sup> | 22.33-37.17   | 25.37 $\pm$ 2.67 <sup>b</sup>                     | 19.00-32.83   | <b>28.54 <math>\pm</math> 2.52</b> <sup>a</sup>   | 23.83-36.17   |
| BldT      | 3.22 $\pm$ 0.7 <sup>a</sup>                     | 1.48-4.84     | 3.26 $\pm$ 0.54 <sup>a</sup>                      | 1.91-4.49     | <b>2.46 <math>\pm</math> 0.62</b> <sup>b</sup>    | 1.08-4.14     |
| PndT      | 4.90 $\pm$ 0.57 <sup>a</sup>                    | 3.36-6.17     | 4.35 $\pm$ 0.54 <sup>b</sup>                      | 2.87-5.71     | <b>3.97 <math>\pm</math> 0.53</b> <sup>c</sup>    | 2.26-5.19     |

YAD: yam anthracnose disease; Pvig: plant vigour; NTPP: number of tubers per plant; YPP: yield per plant; TOxB: tuber oxidation browning; DMC: dry matter content; BldT: boiled tuber quality; PndT: pounded tuber quality.

**Supplementary Table S2.** Factorial loadings, communalities, uniqueness, and predicted genetic gains based on the multi-trait genotype–ideotype distance index for each family (Bold values represent traits with high contribution to each component).

| Variables      | FA1          | FA2          | FA3          | FA4                 | Communality | Uniqueness | Genetic Gain (%) | sense    | goal |
|----------------|--------------|--------------|--------------|---------------------|-------------|------------|------------------|----------|------|
| F1             |              |              |              |                     |             |            |                  |          |      |
| YAD            | -0.08        | 0            | -0.03        | <b>0.96</b>         | 0.93        | 0.07       | -11.67           | decrease | 100  |
| Pvig           | -0.15        | <b>-0.75</b> | -0.1         | -0.21               | 0.64        | 0.36       | 8.95             | increase | 100  |
| NTPP           | <b>-0.45</b> | -0.44        | 0.12         | 0.15                | 0.43        | 0.57       | 23.24            | increase | 100  |
| YPP            | 0.23         | <b>-0.82</b> | -0.02        | 0.16                | 0.76        | 0.24       | 14.56            | increase | 100  |
| TOxB           | <b>-0.74</b> | 0.09         | -0.11        | -0.08               | 0.57        | 0.43       | -14.45           | decrease | 100  |
| DMC            | <b>-0.86</b> | -0.05        | -0.05        | 0.13                | 0.76        | 0.24       | 9.55             | increase | 100  |
| BldT           | -0.32        | -0.05        | <b>-0.83</b> | -0.03               | 0.79        | 0.21       | -17.84           | decrease | 100  |
| PndT           | 0.14         | -0.02        | <b>-0.88</b> | 0.06                | 0.8         | 0.2        | -8.5             | decrease | 100  |
| Total decrease | -52.46       |              |              | average communality | 0.71        |            |                  |          |      |
| Total increase | 56.3         |              |              |                     |             |            |                  |          |      |
| F2             |              |              |              |                     |             |            |                  |          |      |
| YAD            | <b>-0.53</b> | -0.08        | -0.13        | -0.7                | 0.79        | 0.21       | -0.15            | decrease | 100  |
| Pvig           | <b>-0.79</b> | -0.01        | -0.25        | 0.1                 | 0.71        | 0.29       | 14.39            | increase | 100  |
| NTPP           | -0.38        | -0.18        | -0.14        | <b>0.79</b>         | 0.82        | 0.18       | 48.62            | increase | 100  |
| YPP            | <b>-0.88</b> | 0.13         | 0.14         | -0.01               | 0.81        | 0.19       | 17.26            | increase | 100  |
| TOxB           | -0.15        | 0.35         | <b>-0.79</b> | 0.08                | 0.78        | 0.22       | -41.02           | decrease | 100  |
| DMC            | 0.01         | -0.16        | <b>-0.89</b> | -0.03               | 0.81        | 0.19       | 5.28             | increase | 100  |
| BldT           | -0.09        | <b>0.86</b>  | -0.24        | -0.14               | 0.83        | 0.17       | -23.58           | decrease | 100  |
| PndT           | 0.01         | <b>0.89</b>  | 0.13         | 0.03                | 0.82        | 0.18       | -8.21            | decrease | 100  |
| Total decrease | -72.96       |              |              | average communality | 0.80        |            |                  |          |      |
| Total increase | 85.55        |              |              |                     |             |            |                  |          |      |

**Supplementary Table S2 cont.** Factorial loadings, communalities, uniqueness, and predicted genetic gains based on the multi-trait genotype–ideotype distance index for each family (Bold values represent traits with high contribution to each component).

| Variables      | FA1          | FA2         | FA3         | FA4                 | Communality | Uniqueness | Genetic Gain (%) | sense    | goal |
|----------------|--------------|-------------|-------------|---------------------|-------------|------------|------------------|----------|------|
| F3             |              |             |             |                     |             |            |                  |          |      |
| YAD            | <b>0.9</b>   | -0.02       | 0.28        | 0.1                 | 0.91        | 0.09       | -5.11            | decrease | 100  |
| Pvig           | 0.17         | 0.17        | <b>0.79</b> | 0.23                | 0.74        | 0.26       | 13.26            | increase | 100  |
| NTPP           | <b>-0.64</b> | -0.21       | 0.37        | 0.49                | 0.84        | 0.16       | 12.67            | increase | 100  |
| YPP            | 0            | -0.03       | <b>0.91</b> | -0.07               | 0.83        | 0.17       | 7.74             | increase | 100  |
| TOxB           | 0.19         | 0.1         | -0.1        | <b>0.9</b>          | 0.87        | 0.13       | -28.14           | decrease | 100  |
| DMC            | -0.21        | 0.14        | 0.22        | <b>0.71</b>         | 0.61        | 0.39       | 9.76             | increase | 100  |
| BldT           | -0.1         | <b>0.94</b> | 0           | 0.01                | 0.89        | 0.11       | -22.47           | decrease | 100  |
| PndT           | 0.19         | <b>0.88</b> | 0.11        | 0.19                | 0.85        | 0.15       | -29.39           | decrease | 100  |
| Total decrease | -85.11       |             |             | average communality | 0.82        |            |                  |          |      |
| Total increase | 43.43        |             |             |                     |             |            |                  |          |      |
| F4             |              |             |             |                     |             |            |                  |          |      |
| YAD            | <b>-0.74</b> | 0.09        | 0.45        | -0.23               | 0.81        | 0.19       | -6.76            | decrease | 100  |
| Pvig           | <b>-0.8</b>  | -0.17       | -0.34       | -0.04               | 0.78        | 0.22       | 11.49            | increase | 100  |
| NTPP           | 0.02         | 0.25        | <b>-0.9</b> | -0.18               | 0.91        | 0.09       | 28.87            | increase | 100  |
| YPP            | <b>-0.81</b> | -0.06       | 0.02        | 0.38                | 0.81        | 0.19       | -1.44            | increase | 0    |
| TOxB           | 0.17         | 0.42        | <b>0.52</b> | -0.33               | 0.58        | 0.42       | -8.31            | decrease | 100  |
| DMC            | 0.04         | -0.1        | -0.05       | <b>-0.93</b>        | 0.88        | 0.12       | 6.28             | increase | 100  |
| BldT           | 0.01         | <b>0.9</b>  | 0           | 0                   | 0.81        | 0.19       | -19.57           | decrease | 100  |
| PndT           | 0.09         | <b>0.85</b> | -0.1        | 0.1                 | 0.76        | 0.24       | -10.52           | decrease | 100  |
| Total decrease | -45.16       |             |             | average communality | 0.79        |            |                  |          |      |
| Total increase | 45.2         |             |             |                     |             |            |                  |          |      |

YAD: yam anthracnose disease; Pvig: plant vigour; NTPP: number of tubers per plant; YPP: yield per plant; TOxB: tuber oxidation browning; DMC: dry matter content; BldT: boiled tuber quality; PndT: pounded tuber quality.

**Supplementary Table S3.** Factorial loadings, communalities, and uniqueness of genotypes selected per family based on the multi-trait genotype–ideotype index (MGDI). (Bold values represent traits with high contribution to each factor).

| VAR  | FA1             | FA2             | FA3             | FA4             | Communality | Uniqueness |
|------|-----------------|-----------------|-----------------|-----------------|-------------|------------|
| F1   |                 |                 |                 |                 |             |            |
| YAD  | 0.472479        | 0.36136         | <b>0.748787</b> | 0.157797        | 0.939399    | 0.060601   |
| Pvig | <b>0.914766</b> | 0.062093        | -0.02652        | 0.263624        | 0.910853    | 0.089147   |
| NTPP | <b>-0.82748</b> | 0.166941        | 0.04794         | 0.380208        | 0.859446    | 0.140554   |
| YPP  | 0.354493        | 0.185885        | <b>-0.85744</b> | -0.00038        | 0.895427    | 0.104573   |
| TOxB | -0.03346        | -0.04285        | -0.07936        | <b>-0.96776</b> | 0.945805    | 0.054195   |
| DMC  | <b>-0.57935</b> | <b>0.525892</b> | 0.170796        | -0.38126        | 0.786739    | 0.213261   |
| BldT | -0.13898        | <b>-0.81629</b> | -0.12428        | -0.06315        | 0.705073    | 0.294927   |
| PndT | 0.208733        | <b>-0.7247</b>  | 0.14952         | -0.0249         | 0.59174     | 0.40826    |
| F2   |                 |                 |                 |                 |             |            |
| VAR  | FA1             | FA2             | FA3             | Communality     | Uniqueness  |            |
| YAD  | 0.3009          | <b>0.859417</b> | -0.09742        | 0.838629        | 0.161371    |            |
| Pvig | -0.3571         | 0.12296         | <b>-0.76418</b> | 0.726608        | 0.273392    |            |
| NTPP | <b>-0.81627</b> | -0.092          | -0.12544        | 0.69049         | 0.30951     |            |
| YPP  | -0.46407        | <b>0.767377</b> | 0.049046        | 0.806638        | 0.193362    |            |
| TOxB | <b>0.902742</b> | 0.003872        | 0.050531        | 0.817511        | 0.182489    |            |
| DMC  | -0.03112        | -0.04289        | <b>-0.92522</b> | 0.858848        | 0.141152    |            |
| BldT | <b>0.858744</b> | -0.10623        | 0.348878        | 0.870441        | 0.129559    |            |
| PndT | <b>0.849969</b> | -0.05348        | 0.135731        | 0.743731        | 0.256269    |            |
| F3   |                 |                 |                 |                 |             |            |
| VAR  | FA1             | FA2             | Communality     | Uniqueness      |             |            |
| YAD  | <b>0.932074</b> | -0.36067        | 0.998842        | 0.001158        |             |            |
| Pvig | 0.046656        | <b>0.998669</b> | 0.999517        | 0.000483        |             |            |
| NTPP | <b>-0.82484</b> | 0.53428         | 0.965818        | 0.034182        |             |            |
| YPP  | <b>-0.58452</b> | <b>0.591748</b> | 0.69183         | 0.30817         |             |            |
| TOxB | <b>0.973493</b> | -0.21769        | 0.99508         | 0.00492         |             |            |
| DMC  | 0.378255        | <b>-0.62442</b> | 0.532977        | 0.467023        |             |            |
| BldT | <b>0.894611</b> | -0.44044        | 0.994321        | 0.005679        |             |            |
| PndT | <b>0.986215</b> | 0.118907        | 0.98676         | 0.01324         |             |            |
| F4   |                 |                 |                 |                 |             |            |
| VAR  | FA1             | FA2             | FA3             | Communality     | Uniqueness  |            |
| YAD  | <b>-0.94021</b> | -0.0804         | 0.265971        | 0.961199        | 0.038801    |            |
| Pvig | <b>-0.97986</b> | -0.14695        | -0.11868        | 0.995807        | 0.004193    |            |
| NTPP | 0.220728        | <b>-0.77817</b> | -0.17635        | 0.685364        | 0.314636    |            |
| YPP  | 0.007131        | -0.41156        | <b>-0.81509</b> | 0.833805        | 0.166195    |            |
| TOxB | 0.437181        | <b>0.892651</b> | -0.1052         | 0.99902         | 0.00098     |            |
| DMC  | 0.343666        | 0.083771        | <b>-0.92203</b> | 0.975262        | 0.024738    |            |
| BldT | <b>0.956082</b> | -0.27508        | -0.10118        | 0.999999        | 8.83E-07    |            |
| PndT | 0.383507        | -0.46787        | <b>0.594406</b> | 0.719302        | 0.280698    |            |

YAD: yam anthracnose disease; Pvig: plant vigour; NTPP: number of tubers per plant; YPP: yield per plant; TOxB: tuber oxidation browning; DMC: dry matter content; BldT: boiled tuber quality; PndT: pounded tuber quality.
